# Supplementary material for: The Effectiveness of Artificial Intelligence in Assisting Mothers with Assessing Infant Stool Consistency in a Breastfeeding Cohort Study in China
Source: MDPI journal article supplement (doi:10.3390/nu16060855), 2024-03-15
Supplement: s1 [file s1]

**Table S1.** Comparison of maternal and infant characteristics between whether or not uploading pictures.

| Characteristics                                    |                          | Upload pictures (n = 98) | Non-upload pictures (n = 33) | <i>p</i> |
|----------------------------------------------------|--------------------------|--------------------------|------------------------------|----------|
| Age of mother (years) <sup>1</sup>                 | < 30                     | 37 (37.8)                | 9 (27.3)                     | 0.483    |
|                                                    | 30-35                    | 44 (44.9)                | 16 (48.5)                    |          |
|                                                    | > 35                     | 17 (17.3)                | 8 (24.2)                     |          |
| Occupation <sup>1</sup>                            | Employed                 | 86 (87.8)                | 31 (93.9)                    | 0.320    |
|                                                    | Unemployed/Housewife     | 12 (12.2)                | 2 (6.1)                      |          |
| Education level <sup>1</sup>                       | Junior college and below | 34 (34.7)                | 9 (27.3)                     | 0.432    |
|                                                    | University and above     | 64 (65.3)                | 24 (72.7)                    |          |
| Per Capita Monthly Income(yuan/month) <sup>1</sup> | < 6250                   | 21 (21.4)                | 9 (27.3)                     | 0.620    |
|                                                    | 6250-12500               | 51 (52.0)                | 14 (42.4)                    |          |
|                                                    | > 12500                  | 26 (26.6)                | 10 (30.3)                    |          |
| Parity <sup>1</sup>                                | Multiparity              | 40 (40.8)                | 11 (33.3)                    | 0.446    |
|                                                    | Primiparity              | 58 (59.2)                | 22 (66.7)                    |          |
| Pregnancy Complication History <sup>1</sup>        | Yes                      | 60 (61.2)                | 18 (54.5)                    | 0.499    |
|                                                    | No                       | 38 (38.8)                | 15 (45.5)                    |          |
| Mode of delivery <sup>1</sup>                      | Vaginal                  | 65 (66.3)                | 15 (45.5)                    | 0.033    |
|                                                    | Caesarean                | 33 (33.7)                | 18 (54.5)                    |          |
| Postpartum depression <sup>1</sup>                 | Yes                      | 30 (30.6)                | 13 (39.4)                    | 0.353    |
|                                                    | No                       | 68 (69.4)                | 20 (60.6)                    |          |
| EPDS score <sup>2</sup>                            |                          | 7 (4, 12)                | 7 (4, 10)                    | 0.578    |
| The total score of IGSQ <sup>2</sup>               |                          | 25.0 (21.0, 31.0)        | 22.0 (18.0, 27.0)            | 0.012    |
| Stool characteristics <sup>2</sup>                 |                          | 2.0 (2.0, 2.0)           | 2.0 (2.0, 2.0)               | 0.810    |
| Vomiting <sup>2</sup>                              |                          | 6.5 (5.0, 8.0)           | 7.0 (5.0, 8.0)               | 0.640    |
| Crying <sup>2</sup>                                |                          | 7.0 (4.0, 9.0)           | 4.0 (3.0, 6.5)               | 0.001    |
| Fussiness <sup>2</sup>                             |                          | 4.0 (2.0, 6.0)           | 2.0 (2.0, 4.0)               | 0.017    |
| Bloating <sup>2</sup>                              |                          | 6.0 (4.0, 7.0)           | 5.0 (2.0, 6.0)               | 0.289    |
| The total score of PedsQL scale <sup>3</sup>       |                          | 68.9 ± 11.7              | 74.4 ± 12.1                  | 0.021    |
| Physiological functioning <sup>2</sup>             |                          | 66.7 (54.2, 87.5)        | 75.0 (62.5, 100.0)           | 0.011    |
| Physical symptoms <sup>2</sup>                     |                          | 85.0 (77.5, 90.0)        | 87.5 (82.5, 90.0)            | 0.168    |
| Emotional functioning <sup>2</sup>                 |                          | 79.2 (68.2, 91.7)        | 83.3 (74.0, 93.8)            | 0.106    |
| Social functioning <sup>2</sup>                    |                          | 50.0 (31.3, 75.0)        | 62.5 (34.4, 93.8)            | 0.139    |
| Cognitive functioning <sup>2</sup>                 |                          | 12.5 (6.3, 31.3)         | 12.5 (0.0, 25.0)             | 0.346    |
| Psychosocial health summary score <sup>3</sup>     |                          | 62.0 ± 15.0              | 67.4 ± 15.3                  | 0.080    |
| Physical health summary score <sup>3</sup>         |                          | 77.4 ± 11.3              | 83.2 ± 11.1                  | 0.012    |

EPDS, Edinburgh Postnatal Depression Scale; IGSQ, Infant Gastrointestinal Symptom Questionnaire.

<sup>1</sup>presented as N (%).

<sup>2</sup>presented as median (P25, P75).

<sup>3</sup>presented as  $\bar{x} \pm SD$ .

|                    |   | BITSS Score: Researcher |   |   |   |   |     |    |
|--------------------|---|-------------------------|---|---|---|---|-----|----|
|                    |   | 1                       | 2 | 3 | 4 | 5 | 6   | 7  |
| BITSS<br>Score: AI | 1 | 0                       | 0 | 0 | 0 | 0 | 0   | 0  |
|                    | 2 | 0                       | 0 | 0 | 0 | 0 | 0   | 0  |
|                    | 3 | 0                       | 0 | 0 | 0 | 1 | 1   | 0  |
|                    | 4 | 0                       | 0 | 0 | 0 | 0 | 1   | 0  |
|                    | 5 | 0                       | 0 | 0 | 0 | 0 | 0   | 0  |
|                    | 6 | 0                       | 0 | 0 | 0 | 4 | 822 | 7  |
|                    | 7 | 0                       | 0 | 0 | 0 | 0 | 27  | 42 |

**Figure S1.** Agreement between AI and researchers' BITSS scores of 905 stool photographs. The 7 BITSS types are grouped into 4 categories: hard (1-3), formed (4), loose (5-6), and watery (7). BITSS = Brussels Infant and Toddler Stool Scale.

**Table S2.** Tobit regression analysis of mothers' deviation under different education levels.

| Stratified Condition     | Characteristics                  | $\beta$ (95%CI)        | SE    | z      | p     |
|--------------------------|----------------------------------|------------------------|-------|--------|-------|
| Junior college and below | constant                         | 0.024 (-0.571, 0.620)  | 0.304 | 0.080  | 0.936 |
|                          | EPDS score                       | 0.025 (-0.002, 0.051)  | 0.014 | 1.824  | 0.068 |
|                          | Mode of delivery (ref = Vaginal) |                        |       |        |       |
|                          | Caesarean                        | 0.114 (-0.229, 0.456)  | 0.175 | 0.650  | 0.516 |
|                          | Occupation (ref = Employed)      |                        |       |        |       |
|                          | Unemployed/Housewife             | -0.042 (-0.411, 0.327) | 0.188 | -0.223 | 0.824 |
| University and above     | constant                         | -1.269 (-2.238, 0.300) | 0.494 | -2.566 | 0.010 |
|                          | EPDS score                       | 0.028 (-0.007, 0.063)  | 0.018 | 1.590  | 0.112 |
|                          | Mode of delivery (ref = Vaginal) |                        |       |        |       |
|                          | Caesarean                        | 0.217 (-0.131, 0.564)  | 0.177 | 1.220  | 0.222 |
|                          | Occupation (ref = Employed)      |                        |       |        |       |
|                          | Unemployed/Housewife             | 0.804 (0.113, 1.496)   | 0.353 | 2.281  | 0.023 |

EPDS, Edinburgh Postnatal Depression Scale; CI, confidence interval.

**Table S3.** Tobit regression analysis of mothers' deviation under different delivery modes.

| Stratified Condition | Characteristics                                  | $\beta$ (95%CI)        | SE    | z      | p     |
|----------------------|--------------------------------------------------|------------------------|-------|--------|-------|
| Caesarean            | constant                                         | -0.322 (-1.544, 0.900) | 0.623 | -0.516 | 0.606 |
|                      | EPDS score                                       | 0.040 (0.025, 0.075)   | 0.018 | 2.262  | 0.024 |
|                      | Education level (ref = Junior college and below) |                        |       |        |       |
|                      | University and above                             | 0.028 (-0.420, 0.477)  | 0.229 | 0.124  | 0.901 |
|                      | Occupation (ref = Employed)                      |                        |       |        |       |
|                      | Unemployed/Housewife                             | 0.214 (-0.281, 0.709)  | 0.253 | 0.849  | 0.396 |
| Vaginal              | constant                                         | 0.098 (-0.802, 0.999)  | 0.460 | 0.214  | 0.830 |
|                      | EPDS score                                       | 0.014 (-0.015, 0.044)  | 0.015 | 0.955  | 0.339 |
|                      | Education level (ref = Junior college and below) |                        |       |        |       |
|                      | University and above                             | -0.204 (-0.515, 0.107) | 0.159 | -1.287 | 0.198 |
|                      | Occupation (ref = Employed)                      |                        |       |        |       |
|                      | Unemployed/Housewife                             | 0.220 (-0.304, 0.743)  | 0.267 | 0.822  | 0.411 |

EPDS, Edinburgh Postnatal Depression Scale; CI, confidence interval.

**Table S4.** Tobit regression analysis of mothers' deviation under different occupations.

| Stratified Condition                                                 | Characteristics                                         | $\beta$ (95%CI)        | SE    | z      | p     |
|----------------------------------------------------------------------|---------------------------------------------------------|------------------------|-------|--------|-------|
| <b>Employment</b>                                                    | constant                                                | 0.159 (-0.510, 0.827)  | 0.341 | 0.464  | 0.642 |
|                                                                      | <b>EPDS score</b>                                       | 0.024 (0.000, 0.048)   | 0.012 | 1.960  | 0.050 |
|                                                                      | <b>Education level (ref = Junior college and below)</b> |                        |       |        |       |
|                                                                      | University and above                                    | -0.255 (-0.535, 0.026) | 0.143 | -1.779 | 0.075 |
|                                                                      | <b>Mode of delivery (ref = Vaginal)</b>                 |                        |       |        |       |
|                                                                      | Caesarean                                               | 0.160 (-0.118, 0.439)  | 0.142 | 1.127  | 0.260 |
| <b>Unemployment/housewife</b>                                        | constant                                                | -0.858 (-1.812, 0.097) | 0.487 | -1.762 | 0.078 |
|                                                                      | <b>EPDS score</b>                                       | 0.036 (-0.011, 0.082)  | 0.024 | 1.508  | 0.132 |
|                                                                      | <b>Education level (ref = Junior college and below)</b> |                        |       |        |       |
|                                                                      | University and above                                    | 0.601 (0.163, 1.039)   | 0.224 | 2.687  | 0.007 |
|                                                                      | <b>Mode of delivery (ref = Vaginal)</b>                 |                        |       |        |       |
|                                                                      | Caesarean                                               | 0.187 (-0.239, 0.613)  | 0.218 | 0.859  | 0.390 |
| EPDS, Edinburgh Postnatal Depression Scale; CI, confidence interval. |                                                         |                        |       |        |       |
